# Supplementary material for: Core Values that Influence the Patient—Healthcare Professional Power Dynamic: Steering Interaction towards Partnership
Source: Int J Environ Res Public Health. 2020 Nov 15;17(22):8458. doi: 10.3390/ijerph17228458 (PMC7696821; doi:10.3390/ijerph17228458)
Supplement: Supplementary file 1 [file ijerph-17-08458-s001.pdf]

**Supplementary Table S1: Complete list of dimensions and items generated from the qualitative data analysis**

Number of sessions = Number of times each (item) was mentioned per session (interviews & focus groups)

Number of Verbatim = Total number of times an item was mentioned (number of verbatim).

As much as possible, items were formulated based on the words used by the respondents.

| PATIENT VALUES                                                                              |                |                | HEALTHCARE PROFESSIONAL VALUES                                                                                                              |                |                | MUTUAL (PATIENTS & HCPs) VALUES                                                                 |                |                |
|---------------------------------------------------------------------------------------------|----------------|----------------|---------------------------------------------------------------------------------------------------------------------------------------------|----------------|----------------|-------------------------------------------------------------------------------------------------|----------------|----------------|
| Acceptance of Diagnosis and Learning to Overcome limits imposed by the disease              | No of sessions | No of verbatim | Acknowledgment of patients experiential knowledge, competences and expertise                                                                | No of sessions | No of verbatim | Giving, sharing and exchanging information                                                      | No of sessions | No of verbatim |
| <i>Accepting ones diagnosis and illness means getting involved in the care process</i>      |                |                | <i>Recognizing knowledge acquired through experience with the disease and skills related the care received</i>                              |                |                | Gauging (knowing how to dose) the amount of information one gives to each patient               | 12             | 30             |
| Acceptance of illness is a prerequisite for partnership                                     | 10             | 16             | Accepting that patients bring unique skills through their experiences (Accepting the patient as a co-author of their therapeutic journey)   | 4              | 22             | Provision of sufficiently extensive explanations to help patients intervene in decisions making | 7              | 10             |
| Investing in one's health (accepting to take care of thyself) is one's own life insurance   | 4              | 13             | Accepting that patients will seek information elsewhere, and subsequently more open discussions                                             | 7              | 9              | Discussing and sharing information between the healthcare team and also patients                | 4              | 15             |
| Accepting ones diagnosis and the risks of the disease means being able to respond correctly | 3              | 5              | Acknowledging that patients provide data on the peculiarities of a pathology to offer a deeper understanding of what works and what doesn't | 3              | 3              | Discussing prospects (medium and long-term treatment plans) with patients                       | 1              | 2              |
| Learning to test ones abilities to modulate what one can do as a patient                    | 2              | 5              | Changing the way one views patients (starting to consider them as experts in their own right)                                               | 2              | 3              | <b>Communication based on mutual trust and reciprocal respect</b>                               |                |                |
| <i>Taking charge of one's disease</i>                                                       |                |                | Accepting that patients can recognize competent professionals through their personal experiences                                            | 2              | 3              | <i>Discussions based on reciprocal trust</i>                                                    |                |                |
| Finding information about ones illness (on the internet, and abroad)                        | 7              | 13             | <i>Recognizing the evolution of the medical culture for professionals</i>                                                                   |                |                | Trust must be established when entering care                                                    | 8              | 14             |
| Becoming independent in one's healthcare is to gain some freedom                            | 4              | 12             | Remaining open to alternative healthcare, albeit frank in sharing ones professional opinions                                                | 5              | 14             | Showing patients that one (HCPs) has time to listen to them, and reassuring them builds trust   | 7              | 15             |
| Getting involved in monitoring your habits (diet, alternative methods)                      | 3              | 12             | Avoid positioning oneself at the top of the pyramid as the only one with pertinent knowledge                                                | 5              | 11             | HCPs must be able to advise and to refer patients to other HCPs                                 | 3              | 4              |

|                                                                                                         |   |    |                                                                                                     |    |    |                                                                                          |    |    |
|---------------------------------------------------------------------------------------------------------|---|----|-----------------------------------------------------------------------------------------------------|----|----|------------------------------------------------------------------------------------------|----|----|
| Having the opportunity to choose ones treatment among available options                                 | 3 | 8  | Acquisition of professional maturity in healthcare over time (developing ones different skill-sets) | 4  | 5  | Exchange of information should be based on mutual trust and respect                      | 6  | 10 |
| Fighting to make one's self and ones experiences heard                                                  | 2 | 8  | Offering other non-medical and non-surgical treatment options                                       | 3  | 13 | Both actors should be honest in their interactions with each other                       | 2  | 3  |
| Being responsible for sharing experiential knowledge with HCPS, to enrich their knowledge               | 2 | 2  | Acknowledging recommendations that patients bring from other HCPs / specialists                     | 3  | 7  | <b>Relationship based on mutual respect</b>                                              |    |    |
| Learning to deal with the unknown                                                                       | 2 | 2  | <b>Inclusion of patients in the therapeutic process</b>                                             |    |    | Taking patients seriously from the start means accepting that that they are being honest | 9  | 21 |
| <b>Gaining (patient) autonomy</b>                                                                       |   |    | Taking time to include patients in treatment decisions                                              | 10 | 13 | HCPs must be able to show empathy (e.g. trying to put themselves in the patients shoes)  | 9  | 16 |
| <b>Taking the initiative to stay active in one's healthcare</b>                                         |   |    | Checking if patients agree to be involved in the decision making                                    | 10 | 12 | HCPs should make an effort to get to know the patients (background, character)           | 6  | 18 |
| Intervene to participate actively in discussions because disease has become part of one's life          | 8 | 12 | Involving the patient in the management and development of the treatment                            | 8  | 16 | HCPs must take the time to listen to patients                                            | 5  | 10 |
| Taking responsibility manage ones disease by owning it (for as long as possible)                        | 7 | 15 | Integrating patients into the healthcare process, by taking their personal environment into account | 7  | 11 | HCP Communication must be transparent and clear                                          | 4  | 10 |
| Getting informed and asking HCPs questions to clear doubt and gain understanding                        | 6 | 10 | Asking patients questions to find out about their needs and expectations                            | 7  | 7  | HCPs should keep emotionally distant to give unbiased judgment                           | 2  | 2  |
| Taking responsibility to adhere to HCP recommendations                                                  | 5 | 7  | Being ready to initiate partnership at any time during the therapeutic process                      | 6  | 7  | HCPs ought to be cautious not to guilt trip or judge patients who do not want treatment  | 2  | 2  |
| Advancing in the management of ones pathology during the therapeutic journey (both at home and at work) | 5 | 6  | Offering patients treatment options as it is their right                                            | 5  | 9  | <b>Collaboration and Mutual Commitment by both HCPs and patients</b>                     |    |    |
| Finding a HCP with whom one gets along well                                                             | 3 | 7  | Identifying resource patients who could be part of the support team for other patients              | 4  | 9  | Professionals must use plain language to be understood by patients                       | 12 | 24 |
| Knowing how to listen to one's body is to understand what's working and what's not working              | 3 | 6  | Checking whether patients have understood the information received                                  | 3  | 3  | Confidence is built when the patient is supervised by a healthcare team                  | 6  | 11 |

|                                                                                                                            |    |    |                                                                                               |    |    |                                                                                                         |   |    |
|----------------------------------------------------------------------------------------------------------------------------|----|----|-----------------------------------------------------------------------------------------------|----|----|---------------------------------------------------------------------------------------------------------|---|----|
| <i>The frame of mind, level of education and cognitive capability to gain autonomy</i>                                     |    |    | Leaving more initiatives to patients                                                          | 3  | 3  | Multidisciplinary healthcare teams should collaborate and work with patients to find the best solutions | 5 | 19 |
| Possession of the knowledge or intellectual capacity to discuss and understand ones treatments and the therapeutic process | 14 | 18 | Asking for patient's agreement / consent before starting treatment                            | 3  | 3  | HCPs should evaluate and adapt their language to the patient's culture, language and needs              | 5 | 10 |
| Needed level of education or intellectual capacity to discuss and understand                                               | 6  | 17 | <i>Discussing the information to be transmitted to adapt it to the skills of each patient</i> |    |    | Collaborate together with multidisciplinary care teams and patients to find better solutions            | 4 | 18 |
| A sound state of mind in the patient facilitates his care                                                                  | 5  | 4  | Explanations to patients must relate to treatments                                            | 13 | 27 | <b>A reciprocal commitment between professionals and patients</b>                                       |   |    |
| Disease severity impacts the ability to partner in one's care                                                              | 3  | 9  | Checking if (health / treatment) information provided by a patient is accurate                | 7  | 9  | The HCP and the patient goals must be aligned                                                           | 9 | 14 |
|                                                                                                                            |    |    | <i>Showing interest to patients by adopting a partnership attitude</i>                        |    |    | Decisions must be made together, and all parties held accountable                                       | 6 | 8  |
|                                                                                                                            |    |    | (Know how to be a psychologist) Take time to reassure patients                                | 4  | 8  | Actors should consider each other equals                                                                | 4 | 6  |
|                                                                                                                            |    |    | Having partnership attitude gives the patient self-confidence                                 | 4  | 10 | All actors (HCPs and patients) are responsible for patient monitoring and follow-up                     | 4 | 5  |
|                                                                                                                            |    |    | Make the effort to find out if the professionals have not yet encountered this case           | 2  | 5  | The desire to interact in partnership must be accepted by all parties                                   | 4 | 4  |
